# Supplementary material
Source: Research Square preprint supplement (doi:10.21203/rs.3.rs-9001386/v1)

**Repurposed smart tuna-fishing buoys provide real-time ocean intelligence for ecological and blue economy applications**

Mario Lebrato1,2,*, Kathryn Gavira-O’Neill3, Teresa Losada3, Alvaro Bravo4, Nelson Nhamussua1,2, Maria da Graça1,2, Mauro Jije1,2, Ekaterina Kalashnikova1,2, and Calum Murie5

1 BCSS Ocean Observatory. Bazaruto Center for Scientific Studies (BCSS), Benguerra Island, Mozambique.

2 Kisawa Sanctuary. Benguerra Island, Mozambique.

3 Satlink S.L. Alcobendas, Madrid, Spain

4 Universal Plastic (UP). Scientific Technology Park (Gijon), Asturias, Spain.

5 Underwater Africa, Inhambane, Mozambique.

**Keyword:** tuna-fishing, smart buoys, blue economy, ecosystem monitoring, biomass, biodiversity

***Corresponding Author:**

Address: BCSS Ocean Observatory. Bazaruto Center for Scientific Studies (BCSS), Benguerra Island, Mozambique.

E-mail: mario.lebrato@bcssmz.org

Telephone: +34 610 67 77 42

**Supplementary materials**

**Text S1. Blue economy design for smart-buoy systems.** Supplementary details outlining the conceptual and operational integration of smart-buoys with complementary scientific technologies (e.g., hydrophones, benthic landers/cameras, and diver-based surveys) to support real-world applications in blue economy sectors. The framework enables ecosystem monitoring, verification of conservation interventions, and climate adaptation strategies. This text expands upon the system illustrated in Figure 6.

**Modular smart-buoy ecosystem observatory framework for blue economy applications**

**1. Overview**

This framework proposes an integrated, fixed-point/drifting observatory system designed to monitor, verify, and support marine ecosystem recovery and intervention assessments. It scales from local deployments (e.g., individual sites/reef, MPAs) to regional and global observatory networks, providing critical data for the blue economy, marine conservation, and climate policy.

**2. Core System Components**

Each observatory node includes the following interoperable technologies:

| Component | Function |
| --- | --- |
| Smart-buoy | Real-time telemetry of biomass and ocean/weather data |
| Hydrophone | Passive acoustic monitoring of marine mammals, soundscapes, and anthropogenic noise |
| Benthic Lander + Camera | Time-lapse or event-triggered seafloor imagery for biomass dynamics, substrate changes, and species presence |
| Scuba Surveys | Ground-truthing of biomass structure, habitat complexity, biodiversity |

**3. Observational Outputs**

The system delivers high-resolution (hourly to daily), multiscale time-series datasets per site/habitat/ecosystem/region:

- Total biomass and biodiversity metrics.
- Acoustic detection of marine mammal species (biodiversity) and soundscape profiling.
- Species identification (biodiversity) and habitat structure.
- Environmental (ocean/weather) metrics.

**4. Functional Applications**

The observatory supports both scientific research and operational policy in the following domains:

1. Ecological Applications

- Ecosystem recovery monitoring
- Marine Protected Area (MPA) performance.
- Coral, mangrove, and seagrass restoration.
- Fisheries closure or regulation assessments.
- Climate change adaptation in marine systems.

1. Blue Economy/Governance Applications

- Verification for blue bonds & conservation finance.
- Supply/Demand-side verification (accountability, investor trust).
- Marine spatial planning (MSP).
- ESG-aligned investment & biodiversity crediting.
- Industry and coastal infrastructure risk analysis.
- Open-data and SDG-aligned ocean accounting.

**5. Scaling Logic**

The same modular observatory unit can be deployed at:

- Local scale: individual sites, habitats/ecosystems.
- Regional scale: island chains, shelf systems, national parks/MPAs.
- Global scale: observatory networks across EEZs or ocean basins, open-ocean, fisheries arrays.

**6. Ecosystem Targets**

This system is especially suitable for:

- Coral reefs, seagrass, mangroves, open-ocean.
- Seamounts, pinnacles, submarine plateaus.
- Coastal MPAs, endangered species habitats.
- Areas under restoration or policy protection.

**7. Key Benefits**

- Scientific: Time-series biomass/biodiversity baselines, recovery tracking.
- Economic: Verified blue finance, ESG impacts, sustainable resource management.
- Policy: Supports SDG 14, Kunming-Montreal GBF, TNFD reporting frameworks, and climate adaptation strategies.
- Technology: Combines real-time sensing with scalable cloud-data architecture.

**8. End-use sectors (science/economy/policy)**

- Fisheries management.
- Tourism impact monitoring.
- Biodiversity offsets.
- Blue Bonds verification.
- Coastal development risk forecasting.

**9. Summary**

The modular smart-buoy observatory system is a scalable, multidisciplinary system that provides continuous ecological intelligence for marine conservation and blue economy innovation. By integrating sensor technologies and ecological assessment tools into a unified platform, it bridges the gap between marine science, policy, and sustainable finance.

**Figure S1. Satlink software platform interface and smart-buoy deployments in the field.** The Satlink control panel displays the real-time position of a smart-buoy during a fixed-point station deployment cycle over a coral reef, alongside live-streamed biomass time-series data derived from echo-sounder readings. Data are transmitted via satellite to Satlink headquarters and simultaneously integrated into the BCSS Ocean Observatory platform. Also shown are fieldwork photographs documenting buoy deployments and dive surveys conducted to assess megafauna biomass structure and species diversity across habitat types.


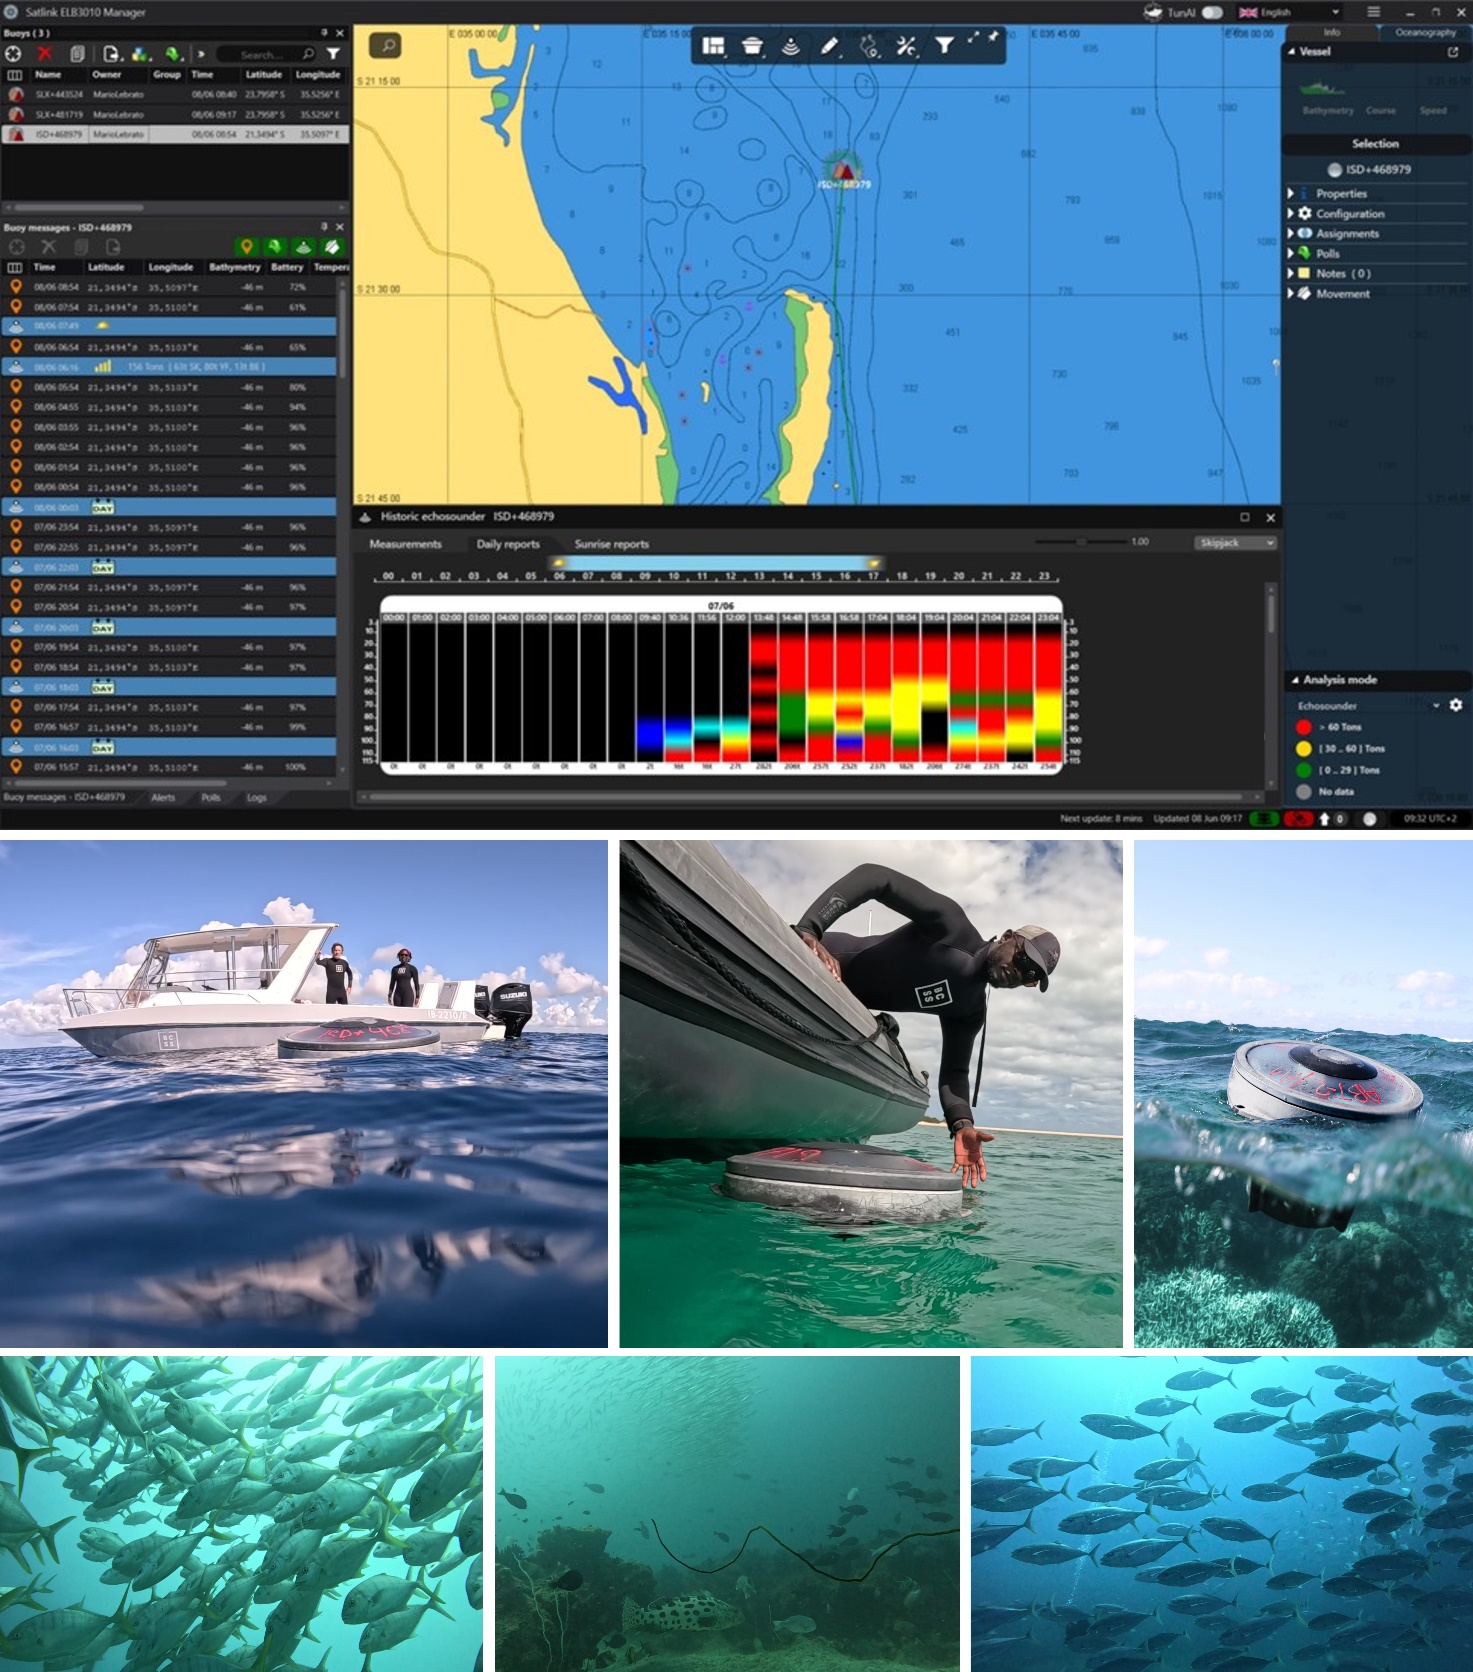


**Figure S2. Ecological metrics across sites and status categories.** (A) Violin plots of six ecological metrics across the four study sites. Points show medians with interquartile ranges. (B) Effect size estimates comparing “healthy” vs. “overfished” sites for each metric. (C) Heatmap of site-level medians per metric per site.


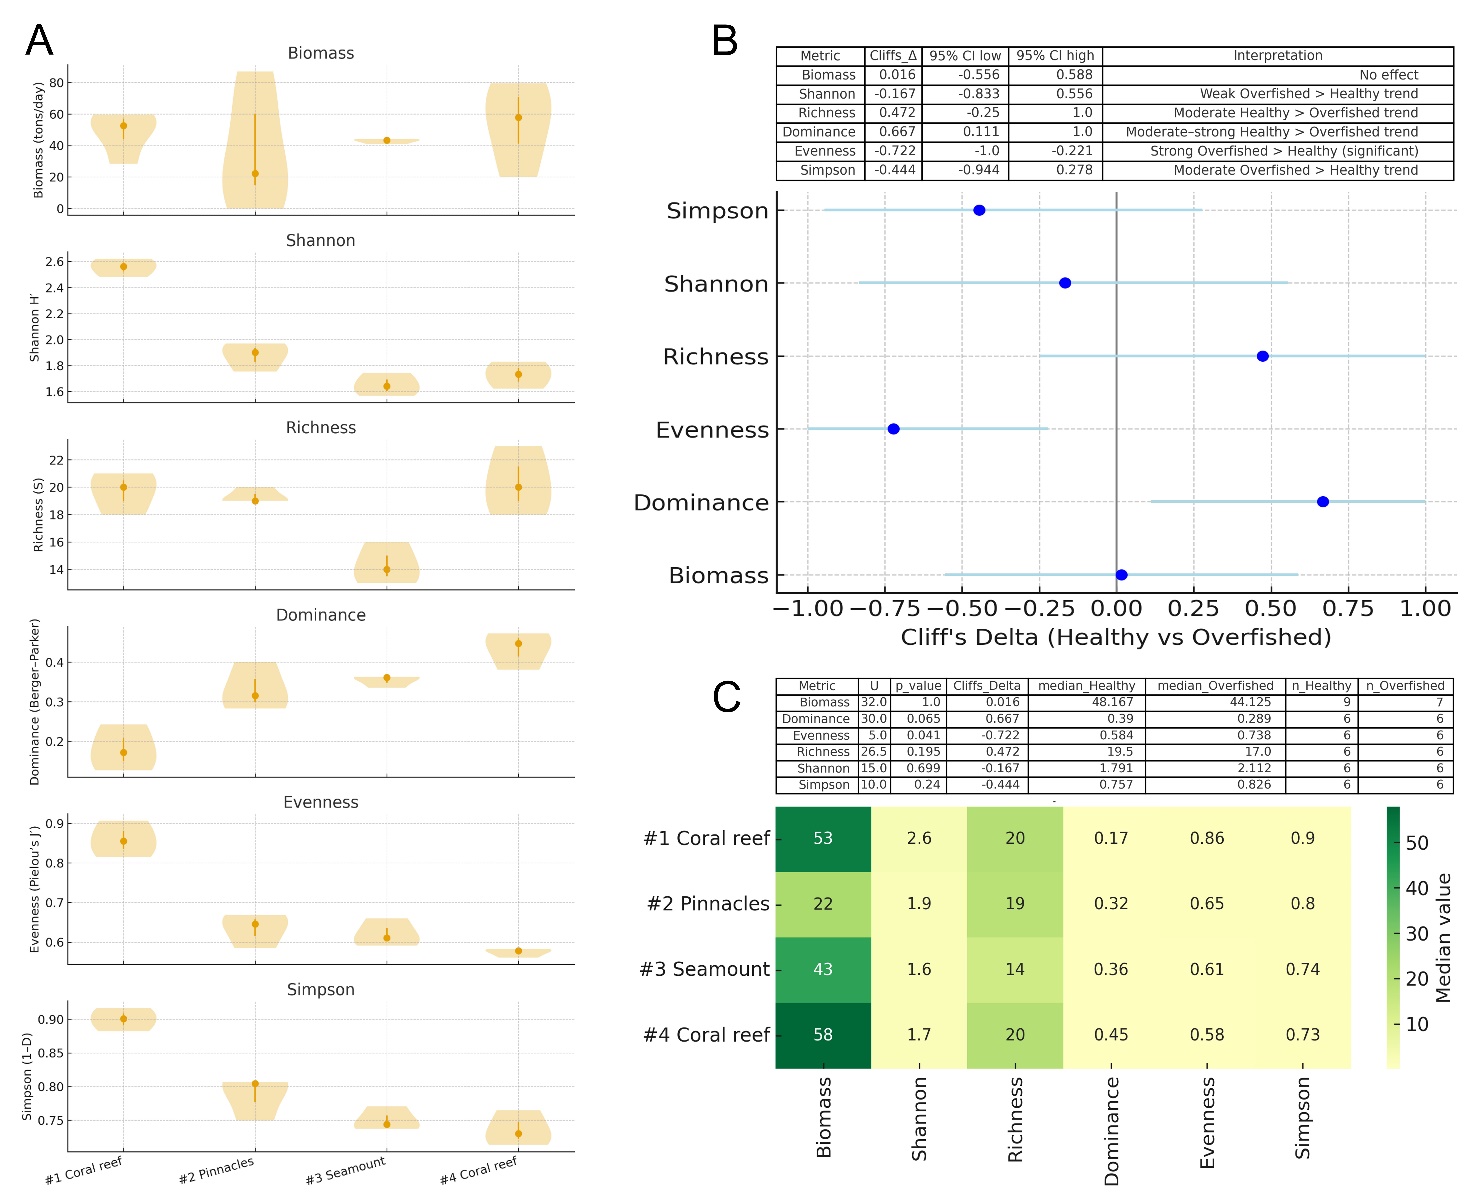


**Tables S1. Smart-buoy operational details in the Bazaruto Archipelago.** Details of environmental (ocean/weather) time-series data, fixed-point deployments (moorings), drifts (grid around the fixed-point), and scuba diving surveys. All datasets are available at the BCSS Ocean Observatory repository ([https://bcssmz.org/](https://bcssmz.org/ocean-observatory-mozambique/)) with DOI links <https://doi.org/10.82174/bcssmz.ocean.observatory.data.access>/ and <https://doi.org/10.82174/bcssmz.ocean.observatory.data.repository/>.


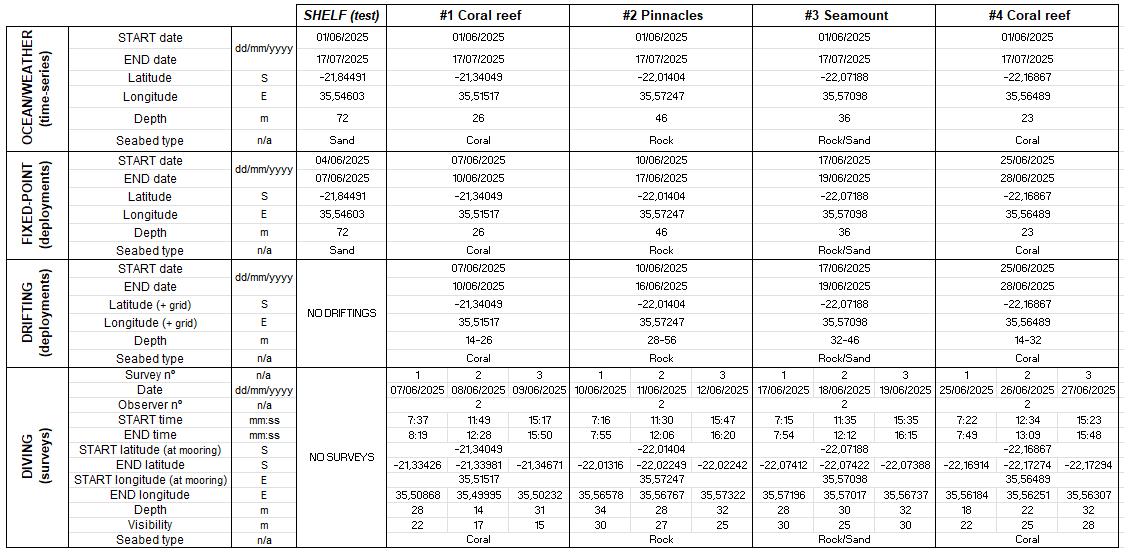

Supplement: Supplementary file 1 [file 1150b849cd1fc9b709c82ab0.docx]
